# Supplementary material
Source: publisher site journal article supplement (https://www.spandidos-publications.com/6701/downloadSupplementary)
Supplement: Supplementary file 1 [file downloadSupplementary]

Table SI. Reagents and conditions for immunohistochemistry.

| Primary antibody | Dilution   | Cat. no. | Supplier                         | Duration, temperature | Antigen retrieval | Secondary antibody                   | Cat. no. | Duration, temperature | IHC device                    |
|------------------|------------|----------|----------------------------------|-----------------------|-------------------|--------------------------------------|----------|-----------------------|-------------------------------|
| Bcl-6            | Prediluted | 760-4241 | Ventana Medical Systems, Inc.    | 32 min, 36°C          | pH 8.5, 95°C      | Ultra View DAB universal             | 109431   | 8 min, 36°C           | Ventana Medical Systems, Inc. |
| CD10             | Prediluted | 790-4506 | Ventana Medical Systems, Inc.    | 16 min, 36°C          | pH 8.5, 95°C      | Ultra View DAB universal             | 109431   | 8 min, 36°C           | Ventana Medical Systems, Inc. |
| CD20             | Prediluted | 760-2531 | Ventana Medical Systems, Inc.    | 16 min, 36°C          | pH 8.5, 95°C      | Ultra View DAB universal             | 109431   | 8 min, 36°C           | Ventana Medical Systems, Inc. |
| CD3              | Prediluted | 790-4341 | Ventana Medical Systems, Inc.    | 16 min, 36°C          | pH 8.5, 95°C      | Ultra View DAB universal             | 109431   | 8 min, 36°C           | Ventana Medical Systems, Inc. |
| CD30             | 1:50       | M0751    | Dako; Agilent Technologies, Inc. | 30 min, RT            | pH 9.0, 100°C     | Histofine Simple stain MAX-PO(MULTI) | 724152   | 30 min, RT            | Nichirei Biosciences, Inc.    |
| CD31             | Prediluted | 760-4378 | Ventana Medical Systems, Inc.    | 16 min, 36°C          | pH 8.5, 95°C      | Ultra View DAB universal             | 109431   | 8 min, 36°C           | Ventana Medical Systems, Inc. |
| CD5              | Prediluted | 790-4451 | Ventana Medical Systems, Inc.    | 16 min, 36°C          | pH 8.5, 95°C      | Ultra View DAB universal             | 109431   | 8 min, 36°C           | Ventana Medical Systems, Inc. |
| CD79a            | Prediluted | 790-4432 | Ventana Medical Systems, Inc.    | 16 min, 36°C          | pH 8.5, 95°C      | Ultra View DAB universal             | 109431   | 8 min, 36°C           | Ventana Medical Systems, Inc. |
| MUM1             | Prediluted | 760-6082 | Ventana Medical Systems, Inc.    | 32 min, 36°C          | pH 8.5, 95°C      | Ultra View DAB universal             | 109431   | 8 min, 36°C           | Ventana Medical Systems, Inc. |

CD, cluster of differentiation; Bcl-6, B-cell lymphoma 6; MUM1, multiple myeloma oncogene 1; RT, room temperature.
